# Supplementary material for: From peels and coffee grounds to tunable carbon nanodots: waste-derived biocarbon meets ultrafast laser ablation
Source: Royal Society of Chemistry journal article supplement (doi:10.1039/d5na00560d), 2025-01-01
Supplement: d5na00560d1.xlsx [file d5na00560d1.xlsx]

## Sheet: OP_Raman
Wavenumber (cm^-1)	Intensity (a.u.)
900	0.777027
912.108	0.824324
924.215	0.824324
936.323	0.817568
948.43	0.824324
960.538	0.837838
972.646	0.851351
984.753	0.851351
996.861	0.851351
1008.97	0.837838
1021.08	0.831081
1033.18	0.844595
1045.29	0.858108
1057.4	0.878378
1069.51	0.878378
1081.61	0.885135
1093.72	0.891892
1105.83	0.891892
1117.94	0.912162
1130.04	0.925676
1142.15	0.952703
1154.26	0.972973
1166.37	0.986486
1178.48	0.986486
1190.58	1
1202.69	1
1214.8	0.986486
1226.91	0.97973
1239.01	0.918919
1251.12	0.905405
1263.23	0.844595
1275.34	0.831081
1287.44	0.783784
1299.55	0.777027
1311.66	0.75
1323.77	0.72973
1335.87	0.722973
1347.98	0.702703
1360.09	0.689189
1372.2	0.682432
1384.3	0.668919
1396.41	0.668919
1408.52	0.655405
1420.63	0.655405
1432.74	0.648649
1444.84	0.655405
1456.95	0.655405
1469.06	0.641892
1481.17	0.628378
1493.27	0.594595
1505.38	0.533784
1517.49	0.527027
1529.6	0.47973
1541.7	0.459459
1553.81	0.452703
1565.92	0.425676
1578.03	0.418919
1590.13	0.412162
1602.24	0.371622
1614.35	0.364865
1626.46	0.364865
1638.57	0.358108
1650.67	0.337838
1662.78	0.331081
1674.89	0.317568
1687	0.317568
1699.1	0.310811
1711.21	0.297297
1723.32	0.290541
1735.43	0.290541
1747.53	0.283784
1759.64	0.283784
1771.75	0.27027
1783.86	0.256757
1795.96	0.25
1808.07	0.243243
1820.18	0.236486
1832.29	0.236486
1844.39	0.236486
1856.5	0.236486
1868.61	0.22973
1880.72	0.216216
1892.83	0.216216
1904.93	0.202703
1917.04	0.202703
1929.15	0.202703
1941.26	0.195946
1953.36	0.189189
1965.47	0.189189
1977.58	0.189189
1989.69	0.182432
2001.79	0.182432
2013.9	0.182432
2026.01	0.182432
2038.12	0.175676
2050.22	0.168919
2062.33	0.168919
2074.44	0.168919
2086.55	0.162162
2098.65	0.162162
2110.76	0.162162
2122.87	0.148649
2134.98	0.148649
2147.09	0.141892
2159.19	0.141892
2171.3	0.148649
2183.41	0.141892
2195.52	0.135135
2207.62	0.135135
2219.73	0.128378
2231.84	0.128378
2243.95	0.121622
2256.05	0.114865
2268.16	0.114865
2280.27	0.114865
2292.38	0.121622
2304.48	0.114865
2316.59	0.108108
2328.7	0.108108
2340.81	0.101351
2352.91	0.101351
2365.02	0.0945946
2377.13	0.0945946
2389.24	0.0810811
2401.35	0.0945946
2413.45	0.0810811
2425.56	0.0743243
2437.67	0.0743243
2449.78	0.0743243
2461.88	0.0675676
2473.99	0.0675676
2486.1	0.0675676
2498.21	0.0608108
2510.31	0.0540541
2522.42	0.0608108
2534.53	0.0608108
2546.64	0.0540541
2558.74	0.0608108
2570.85	0.0540541
2582.96	0.0540541
2595.07	0.0540541
2607.17	0.0540541
2619.28	0.0540541
2631.39	0.0540541
2643.5	0.0540541
2655.61	0.0540541
2667.71	0.0540541
2679.82	0.0540541
2691.93	0.0472973
2704.04	0.0472973
2716.14	0.0472973
2728.25	0.0472973
2740.36	0.0472973
2752.47	0.0472973
2764.57	0.0472973
2776.68	0.0405405
2788.79	0.0472973
2800.9	0.0405405
2813	0.0405405
2825.11	0.0405405
2837.22	0.0405405
2849.33	0.0337838
2861.43	0.0405405
2873.54	0.0337838
2885.65	0.027027
2897.76	0.027027
2909.87	0.0540541
2921.97	0.027027
2934.08	0.027027
2946.19	0.0202703
2958.3	0.0202703
2970.4	0.0202703
2982.51	0.0202703
2994.62	0.0135135
3006.73	0.00675676
3018.83	0.00675676
3030.94	0.0135135
3043.05	0.00675676
3055.16	0.00675676
3067.26	0.0135135
3079.37	0.00675676
3091.48	0.00675676
3103.59	0.00675676
3115.7	0.00675676
3127.8	0.00675676
3139.91	0
3152.02	0.00675676
3164.13	0.00675676
3176.23	0.0135135
3188.34	0.0135135
3200.45	0.0135135
3212.56	0.0135135
3224.66	0.0135135
3236.77	0.0202703
3248.88	0.0202703
3260.99	0.0202703
3273.09	0.0202703
3285.2	0.0202703
3297.31	0.0202703
3309.42	0.0202703
3321.52	0.027027
3333.63	0.027027
3345.74	0.027027
3357.85	0.101351
3369.96	0.027027
3382.06	0.027027
3394.17	0.027027
3406.28	0.0202703
3418.39	0.027027
3430.49	0.0337838
3442.6	0.0202703
3454.71	0.0202703
3466.82	0.0202703
3478.92	0.0202703
3491.03	0.0135135
3503.14	0.0135135
3515.25	0.0135135
3527.35	0.0135135
3539.46	0.00675676
3551.57	0.0135135
3563.68	0.0202703
3575.78	0
3587.89	0
3600	0.00675676

## Sheet: AP_Raman
Wavenumber (cm^-1)	Intensity (a.u.)
900	0.795775
912.108	0.788732
948.43	0.859155
960.538	0.84507
972.646	0.84507
984.753	0.84507
996.861	0.838028
1008.97	0.838028
1021.08	0.838028
1033.18	0.852113
1045.29	0.852113
1057.4	0.866197
1069.51	0.859155
1081.61	0.873239
1093.72	0.880282
1105.83	0.887324
1117.94	0.908451
1130.04	0.915493
1166.37	0.992958
1178.48	1
1190.58	1
1202.69	1
1239.01	0.929577
1251.12	0.887324
1275.34	0.809859
1287.44	0.809859
1299.55	0.78169
1311.66	0.774648
1323.77	0.746479
1335.87	0.739437
1347.98	0.732394
1360.09	0.725352
1372.2	0.711268
1384.3	0.704225
1396.41	0.711268
1408.52	0.711268
1420.63	0.704225
1432.74	0.711268
1444.84	0.704225
1456.95	0.704225
1469.06	0.683099
1529.6	0.528169
1541.7	0.5
1565.92	0.464789
1578.03	0.450704
1590.13	0.43662
1602.24	0.43662
1614.35	0.415493
1626.46	0.415493
1638.57	0.401408
1650.67	0.394366
1662.78	0.380282
1674.89	0.373239
1687	0.366197
1699.1	0.359155
1711.21	0.359155
1723.32	0.34507
1735.43	0.34507
1747.53	0.338028
1759.64	0.330986
1808.07	0.253521
1820.18	0.253521
1844.39	0.21831
1856.5	0.211268
1868.61	0.204225
1880.72	0.204225
1892.83	0.204225
1904.93	0.197183
1917.04	0.197183
1929.15	0.197183
1941.26	0.190141
1953.36	0.190141
1965.47	0.190141
1977.58	0.190141
1989.69	0.183099
2001.79	0.183099
2013.9	0.183099
2026.01	0.176056
2038.12	0.176056
2050.22	0.176056
2062.33	0.176056
2074.44	0.176056
2086.55	0.176056
2098.65	0.169014
2110.76	0.169014
2122.87	0.161972
2134.98	0.161972
2147.09	0.161972
2159.19	0.169014
2171.3	0.169014
2183.41	0.161972
2195.52	0.147887
2207.62	0.147887
2219.73	0.147887
2231.84	0.140845
2243.95	0.133803
2256.05	0.133803
2268.16	0.133803
2280.27	0.133803
2292.38	0.133803
2304.48	0.133803
2316.59	0.126761
2328.7	0.126761
2340.81	0.126761
2352.91	0.119718
2365.02	0.112676
2377.13	0.105634
2389.24	0.105634
2401.35	0.105634
2413.45	0.0915493
2425.56	0.0915493
2437.67	0.0985915
2449.78	0.0915493
2461.88	0.084507
2473.99	0.084507
2486.1	0.0774648
2522.42	0.0704225
2534.53	0.0704225
2546.64	0.0633803
2558.74	0.0633803
2570.85	0.0633803
2582.96	0.0633803
2595.07	0.0633803
2607.17	0.0633803
2619.28	0.0633803
2631.39	0.0633803
2643.5	0.0704225
2655.61	0.0704225
2667.71	0.0704225
2679.82	0.0704225
2691.93	0.0633803
2704.04	0.0704225
2716.14	0.0633803
2728.25	0.0633803
2740.36	0.0633803
2752.47	0.0633803
2764.57	0.0633803
2776.68	0.0633803
2788.79	0.0633803
2800.9	0.0633803
2813	0.0633803
2825.11	0.056338
2837.22	0.0492958
2849.33	0.056338
2861.43	0.056338
2873.54	0.0492958
2885.65	0.0492958
2897.76	0.0492958
2909.87	0.0492958
2921.97	0.0492958
2934.08	0.0422535
2946.19	0.0352113
2958.3	0.0352113
2970.4	0.0352113
2982.51	0.028169
2994.62	0.028169
3006.73	0.028169
3018.83	0.00704225
3030.94	0.00704225
3043.05	0.00704225
3055.16	0.00704225
3067.26	0.0140845
3079.37	0.00704225
3091.48	0
3103.59	0
3115.7	0.00704225
3127.8	0.0140845
3139.91	0.0140845
3152.02	0.0140845
3164.13	0.0211268
3176.23	0.0211268
3188.34	0.0211268
3200.45	0.028169
3212.56	0.028169
3224.66	0.0352113
3236.77	0.0352113
3248.88	0.0352113
3260.99	0.0422535
3273.09	0.0422535
3285.2	0.0422535
3297.31	0.147887
3309.42	0.147887
3321.52	0.147887
3333.63	0.147887
3345.74	0.147887
3357.85	0.15493
3369.96	0.15493
3382.06	0.15493
3394.17	0.147887
3406.28	0.147887
3418.39	0.147887
3430.49	0.140845
3442.6	0.147887
3454.71	0.147887
3466.82	0.0352113
3478.92	0.0492958
3491.03	0.0422535
3503.14	0.028169
3515.25	0.028169
3527.35	0.028169
3539.46	0.0211268
3551.57	0.028169
3563.68	0.028169
3575.78	0.0211268
3587.89	0.0140845
3600	0.0211268

## Sheet: SCG_Raman
Wavenumber (cm^-1)	Intensity (a.u.)
900	0.756579
912.329	0.763158
924.658	0.763158
936.986	0.769737
949.315	0.782895
961.644	0.782895
973.973	0.802632
986.301	0.802632
998.63	0.802632
1010.96	0.809211
1023.29	0.809211
1035.62	0.802632
1047.95	0.842105
1060.27	0.848684
1072.6	0.855263
1084.93	0.855263
1097.26	0.881579
1109.59	0.888158
1121.92	0.907895
1134.25	0.907895
1146.58	0.947368
1158.9	0.953947
1171.23	0.993421
1183.56	1
1195.89	1
1208.22	1
1220.55	0.967105
1269.86	0.835526
1282.19	0.835526
1294.52	0.776316
1306.85	0.769737
1319.18	0.736842
1331.51	0.736842
1343.84	0.710526
1356.16	0.697368
1368.49	0.697368
1380.82	0.697368
1393.15	0.684211
1405.48	0.684211
1417.81	0.684211
1430.14	0.684211
1442.47	0.690789
1454.79	0.690789
1467.12	0.631579
1479.45	0.638158
1516.44	0.493421
1528.77	0.486842
1541.1	0.460526
1553.42	0.453947
1565.75	0.421053
1578.08	0.414474
1590.41	0.401316
1602.74	0.394737
1615.07	0.368421
1627.4	0.361842
1639.73	0.342105
1652.05	0.335526
1664.38	0.335526
1676.71	0.335526
1689.04	0.315789
1701.37	0.309211
1713.7	0.302632
1726.03	0.296053
1738.36	0.289474
1750.68	0.282895
1763.01	0.282895
1775.34	0.276316
1787.67	0.263158
1800	0.263158
1812.33	0.256579
1824.66	0.25
1836.99	0.25
1849.32	0.25
1861.64	0.243421
1873.97	0.236842
1886.3	0.236842
1898.63	0.236842
1910.96	0.230263
1923.29	0.223684
1935.62	0.223684
1947.95	0.223684
1960.27	0.223684
1972.6	0.217105
1984.93	0.210526
1997.26	0.210526
2009.59	0.210526
2021.92	0.210526
2034.25	0.203947
2046.58	0.203947
2058.9	0.197368
2071.23	0.197368
2083.56	0.197368
2095.89	0.190789
2108.22	0.184211
2120.55	0.184211
2132.88	0.184211
2145.21	0.177632
2157.53	0.177632
2169.86	0.177632
2182.19	0.171053
2194.52	0.171053
2206.85	0.164474
2219.18	0.157895
2231.51	0.157895
2243.84	0.151316
2256.16	0.144737
2268.49	0.151316
2280.82	0.151316
2293.15	0.151316
2305.48	0.144737
2317.81	0.138158
2330.14	0.131579
2342.47	0.131579
2354.79	0.125
2367.12	0.118421
2379.45	0.118421
2391.78	0.118421
2404.11	0.111842
2416.44	0.105263
2428.77	0.111842
2441.1	0.111842
2453.42	0.0986842
2465.75	0.0986842
2478.08	0.0921053
2490.41	0.0921053
2502.74	0.0789474
2515.07	0.0789474
2527.4	0.0789474
2539.73	0.0789474
2552.05	0.0789474
2564.38	0.0789474
2576.71	0.0789474
2589.04	0.0723684
2601.37	0.0657895
2613.7	0.0657895
2626.03	0.0657895
2638.36	0.0723684
2650.68	0.0723684
2663.01	0.0723684
2675.34	0.0657895
2687.67	0.0657895
2700	0.0657895
2712.33	0.0657895
2724.66	0.0592105
2736.99	0.0592105
2749.32	0.0592105
2761.64	0.0592105
2773.97	0.0592105
2786.3	0.0592105
2798.63	0.0526316
2810.96	0.0526316
2823.29	0.0526316
2835.62	0.0526316
2847.95	0.0526316
2860.27	0.0460526
2872.6	0.0394737
2884.93	0.0394737
2897.26	0.0394737
2909.59	0.0394737
2921.92	0.0394737
2934.25	0.0328947
2946.58	0.0328947
2958.9	0.0263158
2971.23	0.0263158
2983.56	0.0263158
2995.89	0.0263158
3008.22	0.0197368
3020.55	0.0131579
3032.88	0.00657895
3045.21	0.00657895
3057.53	0.00657895
3069.86	0
3082.19	0
3094.52	0.00657895
3106.85	0.00657895
3119.18	0.0131579
3131.51	0.0131579
3143.84	0.00657895
3156.16	0.0131579
3168.49	0.0131579
3180.82	0.0131579
3193.15	0.0197368
3205.48	0.0263158
3217.81	0.0263158
3230.14	0.0263158
3242.47	0.0263158
3254.79	0.0328947
3267.12	0.0263158
3279.45	0.0263158
3291.78	0.0328947
3304.11	0.0328947
3316.44	0.0394737
3328.77	0.0394737
3341.1	0.0328947
3353.42	0.0328947
3365.75	0.0394737
3378.08	0.0328947
3390.41	0.0328947
3402.74	0.0263158
3415.07	0.0328947
3427.4	0.0328947
3439.73	0.0328947
3452.05	0.0263158
3464.38	0.0328947
3476.71	0.0263158
3489.04	0.0263158
3501.37	0.0197368
3513.7	0.0197368
3526.03	0.0131579
3538.36	0.0197368
3550.68	0.0197368
3563.01	0.0197368
3575.34	0.0131579
3587.67	0.0131579
3600	0.0131579
