# Supplementary material for: From peels and coffee grounds to tunable carbon nanodots: waste-derived biocarbon meets ultrafast laser ablation
Source: Royal Society of Chemistry journal article supplement (doi:10.1039/d5na00560d), 2025-01-01
Supplement: d5na00560d2.xlsx [file d5na00560d2.xlsx]

## Sheet: OP_TGA
Temperature (°C)	Weight (%)
0	97.8571
3.47826	95.7143
6.95652	94.2857
10.4348	93.2143
13.913	92.8571
20.8696	88.9286
24.3478	88.5714
27.8261	87.8571
31.3043	86.0714
34.7826	85.3571
38.2609	84.6429
41.7391	84.2857
45.2174	84.2857
48.6957	83.9286
52.1739	83.5714
55.6522	83.9286
59.1304	83.9286
62.6087	84.6429
66.087	85
69.5652	85
73.0435	85
76.5217	86.0714
80	86.7857
83.4783	87.1429
86.9565	88.2143
90.4348	88.9286
93.913	88.5714
97.3913	90.3571
100.87	90
104.348	89.6429
107.826	91.4286
111.304	91.7857
114.783	91.7857
118.261	91.0714
121.739	91.4286
125.217	91.7857
128.696	90.7143
132.174	90.3571
135.652	89.2857
139.13	88.2143
142.609	88.2143
146.087	87.5
149.565	86.7857
153.043	85.3571
156.522	83.5714
160	83.2143
163.478	80.3571
191.304	22.8571
194.783	15
198.261	8.92857
201.739	7.5
205.217	9
208.696	14.1429
212.174	22.1429
215.652	29.6429
219.13	36.4286
222.609	40
226.087	43.5714
229.565	45
233.043	48.2143
236.522	48.9286
240	50
243.478	50.3571
246.957	51.0714
250.435	51.7857
253.913	52.1429
257.391	53.5714
260.87	54.2857
264.348	55
267.826	55.3571
271.304	55.3571
274.783	55
278.261	54.2857
281.739	53.9286
285.217	52.8571
288.696	52.1429
292.174	51.4286
295.652	50.7143
299.13	50
302.609	49.2857
306.087	48.2143
309.565	46.7857
313.043	45.3571
316.522	42.8571
320	40.1786
323.478	36.0714
326.957	33.9286
330.435	30.7143
333.913	29.6429
337.391	30.7143
340.87	38.5714
344.348	44.1071
347.826	51.4286
354.783	68.9286
358.261	73.5714
361.739	75
365.217	76.4286
368.696	77.8571
372.174	78.9286
375.652	79.6429
379.13	80
382.609	80.7143
389.565	80.7143
393.043	81.0714
396.522	81.0714
400	81.7857
403.478	81.7857
406.957	82.1429
410.435	82.1429
413.913	82.5
417.391	82.8571
420.87	83.2143
424.348	83.5714
427.826	83.9286
431.304	84.6429
434.783	84.2857
438.261	84.2857
441.739	84.6429
445.217	85.3571
448.696	85
452.174	85.7143
455.652	86.0714
459.13	86.0714
462.609	86.0714
466.087	86.7857
469.565	87.5
473.043	88.2143
476.522	87.5
480	87.1429
483.478	87.8571
486.957	87.8571
490.435	87.5
493.913	88.2143
497.391	88.2143
500.87	88.2143
504.348	88.5714
507.826	89.2857
511.304	90
514.783	90.3571
518.261	90
521.739	91.7857
525.217	92.1429
528.696	91.7857
532.174	91.4286
535.652	92.8571
539.13	92.5
542.609	91.7857
546.087	92.1429
549.565	93.2143
553.043	93.2143
556.522	93.5714
560	93.5714
563.478	93.5714
570.435	93.9286
573.913	93.5714
577.391	94.2857
584.348	93.9286
587.826	94.2857
591.304	38.2857
594.783	94.6429
598.261	94.6429
601.739	24.6429
605.217	19.8571
608.696	94.6429
612.174	94.6429
615.652	95
619.13	24.8214
622.609	95.3571
626.087	95
629.565	95
633.043	94.6429
636.522	48.2143
640	24.8214
643.478	95
646.957	95
650.435	47.5
653.913	24.8214
657.391	95
660.87	94.6429
664.348	94.6429
667.826	94.6429
671.304	94.6429
674.783	93.9286
678.261	94.2857
681.739	93.9286
685.217	47.5
688.696	62.619
692.174	92.5
695.652	92.8571
699.13	91.7857
702.609	61.6667
706.087	47.1429
709.565	61.9048
716.522	23.2143
720	45.7143
723.478	45.7143
726.957	89.6429
730.435	89.6429
733.913	90
737.391	89.2857
740.87	89.6429
744.348	36.2857
747.826	90
751.304	23.0357
754.783	90
758.261	23.0357
761.739	90.3571
765.217	60.4762
768.696	89.2857
772.174	60.2381
775.652	89.6429
779.13	90
782.609	0.714286
786.087	90
789.565	89.6429
793.043	89.6429
796.522	89.6429
800	89.6429

## Sheet: AP_TGA
Temperature (°C)	Weight (%)
0	82.3529
3.2	15
9.6	50.2941
12.8	84.7059
16	85.2941
19.2	15
25.6	15.2941
28.8	51.7647
41.6	15
44.8	14.7059
51.2	39.8039
57.6	14.7059
67.2	15.8824
70.4	15.2941
83.2	15.2941
102.4	74.7059
105.6	74.7059
118.4	73.5294
192	18.2353
195.2	16.4706
198.4	16.4706
201.6	16.1765
204.8	15.8824
208	15.8824
211.2	15.5882
214.4	14.7059
217.6	14.7059
240	40.8824
243.2	40.5882
246.4	40
249.6	38.8235
256	38.5294
284.8	67.6471
291.2	68.8235
300.8	70.5882
332.8	75.2941
336	76.4706
390.4	87.6471
393.6	88.2353
403.2	88.8235
422.4	90
425.6	90
428.8	90
438.4	22.0588
448	90.5882
451.2	56.1765
464	90.5882
467.2	22.9412
470.4	22.0588
480	44.7059
492.8	90.5882
496	90.5882
502.4	90.5882
518.4	90
524.8	22.0588
531.2	22.3529
534.4	89.4118
537.6	21.7647
544	55
550.4	88.8235
556.8	88.2353
560	88.8235
563.2	21.7647
569.6	54.4118
572.8	87.0588
576	22.0588
579.2	86.7647
582.4	54.1176
585.6	20.5882
588.8	21.5686
598.4	53.2353
604.8	83.5294
614.4	81.7647
630.4	79.4118

## Sheet: SCG_TGA
Temperature (°C)	Weight (%)
0	11.7647
6.4	10.8824
22.4	11.1765
32	10.8824
38.4	11.1765
48	10.5882
54.4	11.1765
64	11.1765
67.2	10.8824
76.8	11.1765
192	26.1765
195.2	26.1765
224	55.8824
227.2	56.1765
230.4	55.8824
288	63.5294
483.2	17.6471
486.4	17.6471
505.6	17.6471
572.8	17.6471
579.2	17.9412
582.4	17.6471
598.4	17.3529
611.2	17.0588
624	17.6471
659.2	21.7647

## Sheet: Composition
Biomass	Component	Weight %
OP	Pectin	42.5
OP	Hemicellulose	18
OP	Cellulose	9.21
OP	Lignin	0.84
AP	Pectin	0
AP	Hemicellulose	18
AP	Cellulose	28.41
AP	Lignin	35.34
SCG	Pectin	0
SCG	Hemicellulose	36.7
SCG	Cellulose	8.6
SCG	Lignin	3
